# Supplementary material for: Engineering Maxwell–Wagner relaxation and interface carrier confinement in Al 2 O 3 /TiO 2 subnanometric laminates for high-density energy storage applications
Source: Royal Society of Chemistry journal article supplement (doi:10.1039/d4lf00125g), 2024-01-01
Supplement: d4lf00125g1.pdf [file d4lf00125g1.pdf]

# Engineering Maxwell-Wagner relaxation and interface carrier confinement in $\text{Al}_2\text{O}_3/\text{TiO}_2$ subnanometric laminates for high-density energy storage applications

Partha Sarathi Padhi <sup>1,2,\*</sup>, Sanjay K. Rai <sup>2,3</sup>, R. S. Ajimsha<sup>1</sup>, and Pankaj Misra <sup>1,2,\*</sup>

<sup>1</sup>*Oxide nano Electronics Lab., Laser Materials Processing Division, Raja Ramanna Centre for Advanced Technology, Indore 452013, India.*

<sup>2</sup>*Homi Bhabha National Institute, Training School Complex, Anushakti Nagar, Mumbai 400094, India.*

<sup>3</sup>*Accelerator Physics and Synchrotrons Utilization Division, Raja Ramanna Centre for Advanced Technology, Indore 452013, India.*

\*Email: [partha.rrcat@gmail.com](mailto:partha.rrcat@gmail.com), [pmisra@rrcat.gov.in](mailto:pmisra@rrcat.gov.in)

## **Supplementary materials:**

### **RESULTS AND DISCUSSION**

To verify the artificial periodic structure in the as grown  $\text{Al}_2\text{O}_3/\text{TiO}_2/\text{Al}_2\text{O}_3$  nanolaminates (ATA NLs), XRR measurements of a representative [1A-1T-1A] NL, [1A-0.6T-1A] NL and [0.6A-0.6T-0.6A] NL with  $\sim 30$  bilayers and deposited on TiN coated Si

substrates, are carried out and the XRR profiles are depicted in fig. S1(a) with Y-offsets. The loss in Bragg peak intensity with decrease in sublayer thickness ( $t_s$ ) down to 0.6 nm, indicates the loss in distinct layer feature of the NL with  $t_s < 0.6$  nm, plausibly owing to the increased interface roughness and enhanced interface interdiffusion in NLs. However, the appearance of Bragg peak for [0.6A-0.6T-0.6A] NL, although with diminished intensity, signifies the retention of periodic structure even down to this subnanometric regime (i.e.  $t_s = 0.6$  nm). The measured XRR profile of one of the representative NL with  $t_s = 1$  nm (1A-1T-1A NL) is simulated by implementing a (Si-SiO<sub>2</sub>-TiN-(Al<sub>2</sub>O<sub>3</sub>-TiO<sub>2</sub>)<sub>n</sub>-Al<sub>2</sub>O<sub>3</sub>) based multilayer model, mimicking the NL structure, with small aperiodicity in  $t_s$  values. An excellent match between the measured and calculated XRR profiles for NL grown on TiN coated Si is depicted in Fig S1 (b). The alternate alumina and titania sublayer growth in the NL structure can be confirmed from the electron density profiles (EDP), as shown in the inset of fig. S1 (b).

The measured XRR profiles from 0.8A-0.8T NL grown on TiN coated substrate is simulated using aforementioned model and the best fit results regarding the calculated layer thickness, densities and interface width, are summarized in Table S1. From Table S1, the calculated TiO<sub>2</sub>-on-Al<sub>2</sub>O<sub>3</sub> and Al<sub>2</sub>O<sub>3</sub>-on-TiO<sub>2</sub> interface roughness values for 0.8A-0.8T NL grown on Si substrate are found to be  $\sim 0.38$  and  $0.45$  nm, whereas for 0.8A-0.8T NL grown on TiN coated Si substrate are found to be  $\sim 0.52$  and  $0.64$  nm, respectively. Furthermore, from the TEM image analysis of 0.8A-0.8T NL grown on Si substrate, as shown in fig. S1 (c), the calculated physical and visible interface roughness values are found to be  $\sim 0.25$  and  $0.3$  nm for TiO<sub>2</sub> -on- Al<sub>2</sub>O<sub>3</sub> and Al<sub>2</sub>O<sub>3</sub>-on-TiO<sub>2</sub> interfaces, respectively. In spite of this interface roughness, the distinct layer feature in these NLs, as observed from both XRR and TEM measurements, indicate the controlled deposition of subnanometric layers ( $< 1$  nm) using the optimized PLD technique. From the intensity distribution profiles of a representative [0.8A-0.8T-0.8T] NL deposited on Si substrate, as depicted in fig. S1 (d), the

measured  $t_s$  values for  $\text{Al}_2\text{O}_3$  and  $\text{TiO}_2$  sublayers  $0.79 \pm 0.01$  and  $0.82 \pm 0.01$  nm, respectively, are found pretty close to the intended and XRR calculated values.

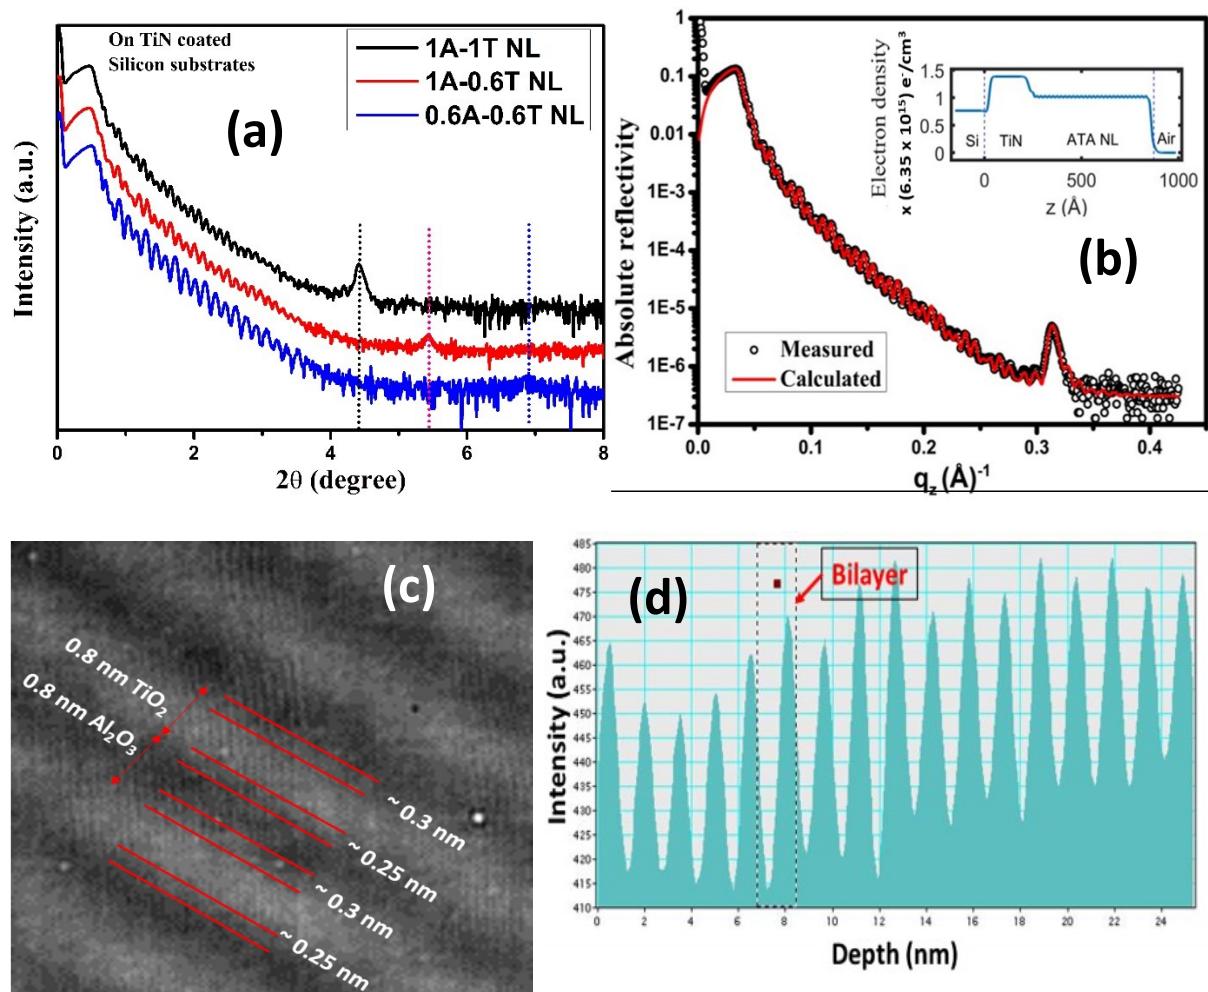

**Fig. S1.** (a) Measured XRR curves for three representative ATA NLs [1A-1T-1A] NL, [1A-0.6T-1A] NL, and [0.6A-0.6T-0.6A] NL deposited on TiN coated Si substrate with Y-offsets. (b) Measured and simulated XRR profile of [1A-1T-1A] NL and the depth variation of electron density profile is displayed in the inset. (c) High-resolution transmission electron microscopy image showing interface roughness of a representative [0.8A-0.8T-0.8T] NL. (d) The intensity variation profile extracted from the TEM image.

**Table S1:** Structural parameters of [0.8A-0.8T-0.8T] NL deposited on Si and TiN coated Si substrates extracted by simulating the XRR data.

| [0.8A-0.8T-0.8T] NL     | $T_{BL}$<br>(nm) | $M_{BL}$<br>(nm)<br>( $\pm 0.02$ ) | Layer thickness<br>(nm)<br>( $\pm 0.02$ ) |                  | % of sublayer Thickness aperiodicity<br>( $\pm 1$ ) |                  | Individual Interface Roughness<br>(nm)<br>( $\pm 0.02$ ) |                  | Density<br>(g/cm <sup>3</sup> )<br>( $\pm 0.02$ ) |                  |
|-------------------------|------------------|------------------------------------|-------------------------------------------|------------------|-----------------------------------------------------|------------------|----------------------------------------------------------|------------------|---------------------------------------------------|------------------|
|                         |                  |                                    | Al <sub>2</sub> O <sub>3</sub>            | TiO <sub>2</sub> | Al <sub>2</sub> O <sub>3</sub>                      | TiO <sub>2</sub> | Al <sub>2</sub> O <sub>3</sub>                           | TiO <sub>2</sub> | Al <sub>2</sub> O <sub>3</sub>                    | TiO <sub>2</sub> |
| <b>On Si</b>            | 1.6              | 1.71                               | 0.87                                      | 0.84             | 10                                                  | 16               | 0.38                                                     | 0.45             | 3.32                                              | 4.10             |
| <b>On TiN coated Si</b> | 1.6              | 1.68                               | 0.83                                      | 0.85             | 3                                                   | 6                | 0.52                                                     | 0.64             | 3.08                                              | 3.78             |

\* Abbreviations of  $T_{BL}$  and  $M_{BL}$  denote targeted and measured bilayer thicknesses, respectively.

### **Comparing device performance parameters**

In order to evaluate the usefulness of the TiN/ATA-NL/TiN based MIMCAPs, it is essential to compare the dielectric performance parameters of our best performed ATA NL based dielectric (in this work) with other NL based dielectric materials in literature. Table S2, presents a quantitative comparison of few important fundamental and derived dielectric performance parameters, such as dielectric constant ( $\epsilon_r$ ), dielectric loss ( $\tan\delta$ ), cut-off frequency ( $f_c$ ), equivalent oxide thickness (EOT), Breakdown electric field ( $E_{break}$ ), capacitance density ( $C/A$ ) and leakage current density ( $J_{leak}$ ) etc. Although the series capacitances of low dielectric constant Al<sub>2</sub>O<sub>3</sub> barrier layers impose an adverse effect on the overall high dielectric constant, it is highly beneficial for reduction in carrier loss and leakage current in these NLs. Hence it needs an optimization of barrier layer thickness before

integrating into final circuits to circumvent the degradation in dielectric constant values and hence the capacitance density.

Although, the  $\tan \delta$  and  $J_{leak}$  is minimum for 5A/(0.6A-1T-0.6A)/5A NL, the overall capacitance and hence the dielectric constant is reduced owing to low dielectric constant alumina layers in series with the NL. In order to preserve a sizeable Maxwell-Wagner effect, along with a reduced dielectric loss and leakage currents, an optimized Al<sub>2</sub>O<sub>3</sub> interfacial barrier layer is inevitable. Considering the requirements set by international technology roadmap of semiconductors (ITRS)-2023 for the high-density energy storage applications, the MIM capacitor should have high k, high cut-off frequency, low loss and low leakage current density etc. [1] From Table S1, we found that 3A/(0.6A-1T-0.6A)/3A NL is closely satisfying these ITRS requirements. Among previous reports, [2-4] the ATA stack based MIM devices fabricated in this work, with a comparatively larger device area of  $3.1 \times 10^4 \mu\text{m}^2$ , seem to be superior in terms of exhibited parameters. Further improvements in the  $\epsilon_r$  up to a higher  $f_c$  is possible by employing a large number of interfaces and simultaneous reduction in sublayer thickness.

**Table S2:** Comparison of the performance parameters of our PLD grown TiN/ATA NL/TiN capacitors with previously reported NLs in literature.

| Dielectric stack-<br>(sublayer thickness in nm)<br>(Total stack thickness in nm)<br>[Reference] | Growth<br>technique,<br>processing<br>temperature<br>(°C),<br>top/Bottom<br>electrode | Dielectric<br>Constant,<br>Loss<br>tangent,<br>Cut-off<br>frequency | EOT (nm),<br>Capacitance<br>density<br>(fF/ $\mu\text{m}^2$ ),<br>@100Hz | Leakage<br>current density<br>(A/cm <sup>2</sup> ),<br>Breakdown<br>voltage (volt) |
|-------------------------------------------------------------------------------------------------|---------------------------------------------------------------------------------------|---------------------------------------------------------------------|--------------------------------------------------------------------------|------------------------------------------------------------------------------------|
| Requirement set by ITRS<br>2023 [1]                                                             | ____, < 400<br>for BEOL,<br>_____                                                     | >> 3.9,<br><0.04,<br>1MHz                                           | < 2 nm,<br>>13fF/ $\mu\text{m}^2$ @<br>1KHz-1MHz                         | < 1 X 10 <sup>-8</sup> @1V,<br>>3V                                                 |
| (0.6A-1T-0.6A) NL<br>- (60)<br>[Our work]                                                       | PLD, 300,<br>TiN/ TiN                                                                 | 733, 0.18,<br>100 KHz                                               | 0.32,<br>108.16                                                          | 1.18 x 10 <sup>-5</sup><br>@1V, 1.59                                               |

|                                                          |                       |                        |                 |                                      |
|----------------------------------------------------------|-----------------------|------------------------|-----------------|--------------------------------------|
| <b>1A/(0.6A-1T-0.6A) NL/1A<br/>- (60)<br/>[Our work]</b> | PLD, 300,<br>TiN/ TiN | 484, 0.078,<br>250 KHz | 0.5,<br>69.11   | $3.2 \times 10^{-6}$ @1V,<br>2.91    |
| <b>3A/(0.6A-1T-0.6A) NL/3A<br/>- (60)<br/>[Our work]</b> | PLD, 300,<br>TiN/ TiN | 247, 0.032,<br>500 KHz | 1.04,<br>33.13  | $3.08 \times 10^{-7}$<br>@1V, 4.26   |
| <b>5A/(0.6A-1T-0.6A) NL/5A<br/>- (60)<br/>[Our work]</b> | PLD, 300,<br>TiN/ TiN | 100, 0.013,<br>1 MHz   | 2.73,<br>12.64  | $2.1 \times 10^{-9}$ @1V,<br>7.007   |
| <b>ATA NL-<br/>5A/{0.5A/0.5T}/2A-<br/>(5/80/2) - [2]</b> | PLD, 100,<br>TiN/TiN  | 90, 0.07,<br>10 KHz    | 3.77,<br>9.15   | $1 \times 10^{-6}$ @<br>0.87V, _____ |
| <b>(0.5A-0.5T-0.5A) NL-(150) -<br/>[3]</b>               | ALD, 300,<br>Pt/Pt    | 810, 6<br>10 KHz       | 0.722,<br>47.81 | $3 \times 10^{-1}$ @1V,<br>_____     |
| <b>5A/{0.3A/0.7T} NL-<br/>(5/150) - [4]</b>              | ALD, 300,<br>Pt/Pt    | 550, 0.02<br>1 MHz     | 1.009,<br>31.4  | $3 \times 10^{-8}$<br>@1V, _____     |

[Specimen designation are as follows: A-Al<sub>2</sub>O<sub>3</sub>, T-TiO<sub>2</sub>, Z-ZrO<sub>2</sub>, S-SiO<sub>2</sub>, H-HfO<sub>2</sub>, L-La<sub>2</sub>O<sub>3</sub>

ALD-Atomic layer deposition, 3A/20T/3A signifies the 3nm thick Al<sub>2</sub>O<sub>3</sub> encapsulation of 20 nm TiO<sub>2</sub> film.]

## References

1. P.S. Padhi, R.S. Ajimsha, S. K. Rai, A. Bose, and P. Misra, Effect of Al<sub>2</sub>O<sub>3</sub> layer thickness on leakage current and dielectric properties of atomic layer deposited Al<sub>2</sub>O<sub>3</sub>/TiO<sub>2</sub>/Al<sub>2</sub>O<sub>3</sub> nano-stack. J Mater Sci: Mater Electron, 34(14) (2023), p.1160.
2. M. Ben Elbahri, A. Kahouli, B. Mercey, O. Lebedev, W. Donner, U. Lüders, Study on the dielectric properties of Al<sub>2</sub>O<sub>3</sub>/TiO<sub>2</sub> sub-nanometric laminates: effect of the bottom electrode and the total thickness. J. Phys. D: Applied Physics, 51(6) (2018), 065101
3. W. Li, O. Auciello, R. N. Premnath, and B. Kabius, Giant dielectric constant dominated by Maxwell–Wagner relaxation in Al<sub>2</sub>O<sub>3</sub>/TiO<sub>2</sub> nanolaminates synthesized by atomic layer deposition. Appl. Phys. Lett. 96 (2010), 162907.
4. G. Lee, B.-K. Lai, C. Pathak, R. S. Katiyar, and O. Auciello, “Tailoring dielectric relaxation in ultra-thin high-dielectric constant nanolaminates for nanoelectronics,” Appl. Phys. Lett. 102 (2013), 142901.
